# Supplementary material for: Regression and Eradication of Triple-Negative Breast Carcinoma in 4T1 Mouse Model by Combination Immunotherapies
Source: MDPI journal article supplement (doi:10.3390/cancers15082366), 2023-04-19
Supplement: s1 [file s1]

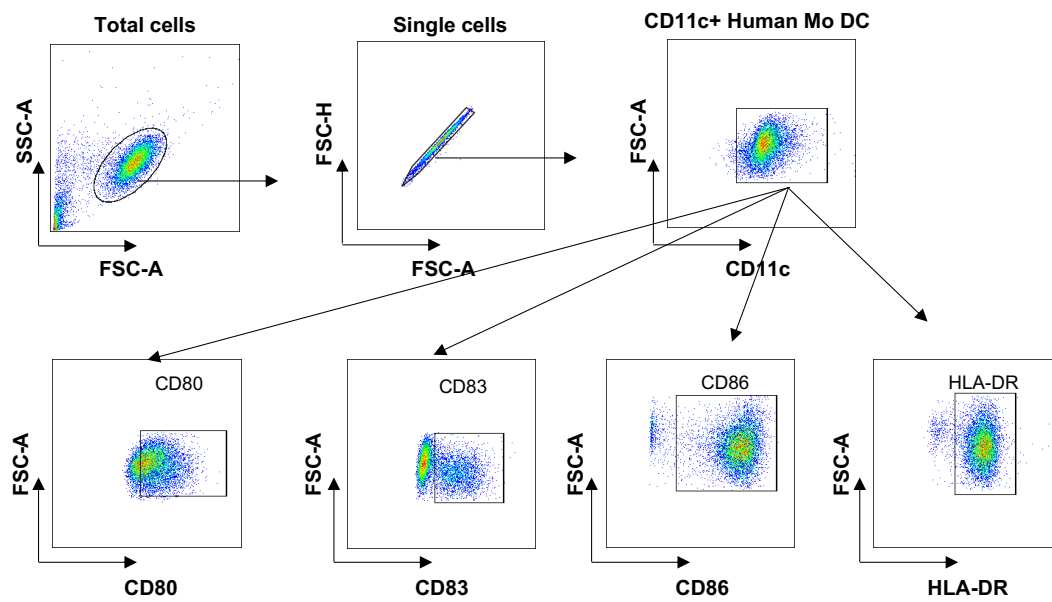

**Supplementary Figure S1.** Gating strategy for analyzing MoDC expression of CD80, CD83, CD86, and HLA-DR.

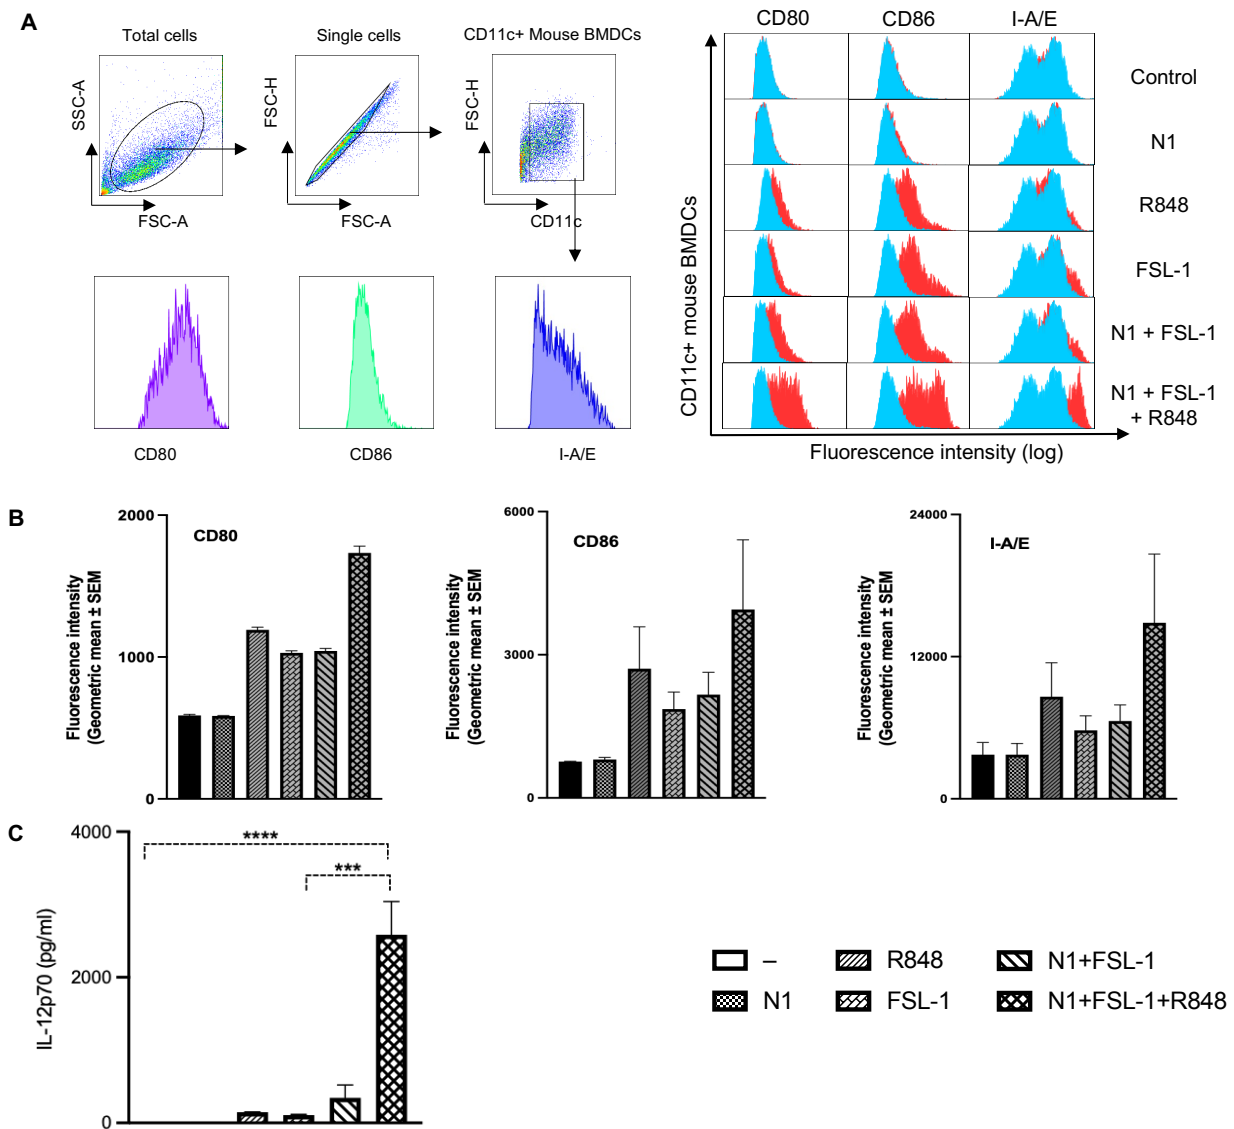

**Supplementary Figure S2.** Synergistic activation of mouse bone marrow derived dendritic cells (BMDC) by HMGN1, R848, and FSL-1. (A) Gating strategy and overlay histograms of BMDCs showing upregulation of CD80, CD86, and I-A/E in response to various treatments. (B) Average MFI (geometric mean  $\pm$  SEM) of CD80, CD86, and I-A/E expression of three separate experiments. (C) IL-12 production in (pg/mL) in supernatants of BMDC cultures in response to indicated treatments (mean  $\pm$  SEM, n=3).
